# Supplementary material
Source: ML conference proceedings conference paper supplement (https://proceedings.mlr.press/v225/vukadinovic23a.html)
Supplement: Supplementary file 1 [file vukadinovic23a-supp.pdf]

| <b>Variable</b>   | <b>Total</b>                                                                                                                                                                                                                                                                                                                                                                                                                                                                    |
|-------------------|---------------------------------------------------------------------------------------------------------------------------------------------------------------------------------------------------------------------------------------------------------------------------------------------------------------------------------------------------------------------------------------------------------------------------------------------------------------------------------|
| Age (mean (SD))   | 55.14 (7.57)                                                                                                                                                                                                                                                                                                                                                                                                                                                                    |
| Female = TRUE (%) | 23,587 (52%)                                                                                                                                                                                                                                                                                                                                                                                                                                                                    |
| Ethnicity         | British 41,446<br>Any other white background 1,396<br>Irish 1,172<br>Indian 328<br>Other ethnic group 232<br>Caribbean 168<br>African 132<br>Chinese 132<br>Prefer not to answer 103<br>Pakistani 79<br>Any other Asian background 75<br>White and Asian 66<br>Any other mixed background 66<br>White and Black Caribbean 48<br>White and Black African 27<br>White 26<br>Bangladeshi 8<br>Do not know 6<br>Mixed 3<br>Any other Black background 3<br>Asian or Asian British 1 |

Table 1: Demographics of our training cohort
